# Supplementary material for: ESBL Displace: A Protocol for an Observational Study to Identify Displacing Escherichia coli Strain Candidates from ESBL-Colonized Travel Returners Using Phenotypic, Genomic Sequencing and Metagenome Analysis
Source: MDPI journal article supplement (doi:10.3390/microbiolres14010015), 2023-01-31
Supplement: s1 [file s1]

Archive with 5 entries (5 files):
- Supplementary File S1. Questionnaire before the trip.pdf
- Supplementary File S2. Questionnaire after the trip.pdf
- Supplementary File S3. Questionnaire at Follow-up.pdf
- Supplementary File S4. Ethical approval_EKNZ.pdf
- Supplementary File S5. Funding proposal_Gerbert Ruef Foundation.pdf
