# Supplementary material for: ESBL Displace: A Protocol for an Observational Study to Identify Displacing Escherichia coli Strain Candidates from ESBL-Colonized Travel Returners Using Phenotypic, Genomic Sequencing and Metagenome Analysis
Source: MDPI journal article supplement (doi:10.3390/microbiolres14010015), 2023-01-31
Supplement: s1 [file s1 › Supplementary File S2. Questionnaire after the trip.pdf]

## **Questionnaire after the trip**

**Subject number:**

**Date on which the questionnaire was completed (DD/MM/YYYY):** .....

**Question 1: Have you currently travelled to other countries besides Southeast Asia**

- ☐ Yes ☐ No

**If yes:**

1.1 Which country/countries?

.....

**Question 2: What was the main purpose of your trip?**

- |                     |                              |                             |
|---------------------|------------------------------|-----------------------------|
| <b>Tourist</b>      | <input type="checkbox"/> Yes | <input type="checkbox"/> No |
| <b>Professional</b> | <input type="checkbox"/> Yes | <input type="checkbox"/> No |

**Question 3: Which type of accommodation did you use most often (please tick only one answer)?**

- ☐ Hotels (medium to upper category)
- ☐ Simple Hotels/Guest Houses
- ☐ Private accommodation with strangers
- ☐ Private accommodation with family/friends
- ☐ Others:.....

**Question 4: Where did you mainly eat (please tick only one answer)?**

- ☐ Restaurant/Hotel
- ☐ Street stall/Take away
- ☐ Private (self-cooked/family/friends)

**Question 5: Did you drink alcohol on a daily basis?**

- ☐ Yes ☐ No

**Question 6: Which of the following foods/drinks did you have during the trip (multiple answers possible)?**

- |                                            |                                                   |                                                  |
|--------------------------------------------|---------------------------------------------------|--------------------------------------------------|
| <input type="checkbox"/> Tap water         | <input type="checkbox"/> Ice cubes                | <input type="checkbox"/> Dairy products          |
| <input type="checkbox"/> Ice cream         | <input type="checkbox"/> Raw meat                 | <input type="checkbox"/> Burger                  |
| <input type="checkbox"/> Other meat        | <input type="checkbox"/> Lobster/Shrimps          | <input type="checkbox"/> Raw oysters             |
| <input type="checkbox"/> Salad             | <input type="checkbox"/> Mayonnaise-based sauces  | <input type="checkbox"/> Food from street stalls |
| <input type="checkbox"/> Patisserie/Mousse | <input type="checkbox"/> Unpeeled/unwashed fruits |                                                  |

**Question 7: Have you suffered from diarrhoea during the current trip?**

- ☐ Yes ☐ No

**If yes:**

7.1 In which country/countries did they have diarrhoea?

.....

7.2 What is the maximum number of unformed bowel movements you had per 24 hours?

- ☐ 1-2  
☐ 3-5  
☐ 6 or more

7.3 Did one or more of the following symptoms occur in addition to diarrhoea?

- |                        |                              |                             |
|------------------------|------------------------------|-----------------------------|
| Nausea                 | <input type="checkbox"/> Yes | <input type="checkbox"/> No |
| Vomiting               | <input type="checkbox"/> Yes | <input type="checkbox"/> No |
| Pain during defecation | <input type="checkbox"/> Yes | <input type="checkbox"/> No |
| Abdominal cramps       | <input type="checkbox"/> Yes | <input type="checkbox"/> No |
| Fiever (> 37.5°C)      | <input type="checkbox"/> Yes | <input type="checkbox"/> No |
| Blood in the stool     | <input type="checkbox"/> Yes | <input type="checkbox"/> No |
| Weight loss            | <input type="checkbox"/> Yes | <input type="checkbox"/> No |

7.4 Did you see a doctor/hospital for diarrhoea during the trip?

- ☐ Yes ☐ No

7.5 Was a stool examination carried out?

- ☐ Yes Result: .....  
☐ No  
☐ Don't know

7.6 Have you received/taken an antibiotic on your own?

- ☐ Yes
  - ☐ Ciprofloxacin/Ciproxin/other generic drug
  - ☐ Azithromycin/Zithromax/other generic drug
  - ☐ Metronidazole/Flagyl
  - ☐ Name of antibiotic unknown
  - ☐ Others: .....
- ☐ No
- ☐ Don't know

7.7 Have you taken any other medicine for diarrhoea (multiple answers possible)?

- ☐ Yes
  - ☐ Imodium/Loperamid
  - ☐ Perenterol
  - ☐ Bioflorin
  - ☐ Charcoal tablets
  - ☐ Others: .....
- ☐ No

7.8 Did you have more than one episode of diarrhoea during the trip (with at least 3 days without symptoms in between)?

- ☐ Yes                      Number of episodes:.....
- ☐ No

7.9 How long did you have diarrhoea in total?

Number of days: .....

7.10 How severe was the diarrhoea (indicate worst episode if more than one)?

Light (it did not affect my travel plans)

- ☐ Yes                      ☐ No

Medium (I had to do without individual plans)

- ☐ Yes                      ☐ No

Heavy (I had to stay in bed and/or went to the doctor)

- ☐ Yes                      ☐ No

7.11 Did other people who travelled with you have similar symptoms?

- ☐ Yes                      ☐ No                      ☐ Don't know

**Question 8: Have you taken antibiotics during the current trip for any reason other than traveler's diarrhea?**

- ☐ Yes ☐ No

**If yes:**

**Name of the antibiotic:** .....

**Date (from/to):** .....

**Number of doses/day:** .....

**Reason:** .....

**Question 9: Have you regularly taken acid blockers (Nexium®, Pantozol® etc) during the current trip?**

- ☐ Yes ☐ No

**If yes:**

- ☐ Daily  
☐ Several times a week  
☐ Less than 1x/week

**Question 10: Have you regularly taken other medicines during the current trip?**

- ☐ Yes ☐ No

**If yes:**

Please list medicines:

.....

**Question 11: Were you in hospital during the current trip?**

- ☐ Yes ☐ No

**If yes:**

11.1 Which hospital(s): .....

11.2 How long were you in hospital (in days): .....

11.3 Reason (e.g. surgery): .....

---

Thank you very much for your important help and for patiently filling in the questions - this helps us a lot in our research into antibiotic resistance in bacteria.

If you have any questions or uncertainties, please feel free to contact the study coordinator:

**Dr. med. Esther Künzli**, Swiss Tropical and Public Health Institute Basel, Socinstrasse 57,  
P.O. Box, 4002 Basel; [esther.kuenzli@swisstph.ch](mailto:esther.kuenzli@swisstph.ch); Tel. +41 61 284 82 55
