# Supplementary material for: ESBL Displace: A Protocol for an Observational Study to Identify Displacing Escherichia coli Strain Candidates from ESBL-Colonized Travel Returners Using Phenotypic, Genomic Sequencing and Metagenome Analysis
Source: MDPI journal article supplement (doi:10.3390/microbiolres14010015), 2023-01-31
Supplement: s1 [file s1 › Supplementary File S3. Questionnaire at Follow-up.pdf]

## **Questionnaire Follow up**

**Subject number:**

**Date on which the questionnaire was completed (DD/MM/YYYY):** .....

### **Question 1: Have you been on holiday abroad since the last study check?**

☐ Yes ☐ No

**If yes:**

Country: ..... Date (from/to): .....

### **Question 2: Have you been hospitalised abroad since the last study control?**

☐ Yes ☐ No

**If yes:**

2.1 In which country/countries were you in hospital: .....

2.2 How long were you in hospital (in days): .....

2.3 Reason for hospitalisation (e.g. surgery): .....

### **Question 3: Have you been hospitalised in Switzerland since the last study control?**

☐ Yes ☐ No

**If yes:**

3.1 Which hospital(s): .....

3.2 How long were you in hospital (in days): .....

3.3 Reason (e.g. surgery): .....

**Question 4: Have you taken antibiotics since the last study control?**

- ☐ Yes ☐ No

**If yes** (please provide separate information for each intake):

|                        | Episode 1 | Episode 2 | Episode 3 |
|------------------------|-----------|-----------|-----------|
| Name of the antibiotic |           |           |           |
| Date (from/to)         |           |           |           |
| Number of doses/day    |           |           |           |
| Reason                 |           |           |           |

**Question 5: Have you had any of the symptoms below on at least 3 days per month since the last study control (multiple answers possible)?**

- ☐ Abdominal pain ☐ Diarrhoea ☐ Constipation  
☐ Mucous stools ☐ Flatulence  
☐ I have no complaints

**Question 6: Have you regularly taken acid blockers (Nexium®, Pantozol® etc) since the last study control?**

- ☐ Yes ☐ No

**If yes:**

- ☐ Daily  
☐ Several times a week  
☐ Less than 1x/week

**Question 7: Have you taken other medicines regularly since the last study control?**

- ☐ Yes ☐ No

**If yes:**

Please list medicines:

.....  
.....

**Question 8: How have you been eating since the last study control?**

- ☐ Meat daily
- ☐ 3-5x/week meat
- ☐ 1-2x/week meat
- ☐ Less than 1x/week meat
- ☐ Consistently vegetarian (with fish)
- ☐ Consistently vegetarian (without fish)
- ☐ Consequently vegan
- ☐ Others: .....

---

Thank you very much for your important help and for patiently filling in the questions - this helps us a lot in our research into antibiotic resistance in bacteria.

If you have any questions or uncertainties, please feel free to contact the study coordinator:

**Dr. med. Esther Künzli**, Swiss Tropical and Public Health Institute Basel, Socinstrasse 57,  
P.O. Box, 4002 Basel; [esther.kuenzli@swisstph.ch](mailto:esther.kuenzli@swisstph.ch); Tel. +41 61 284 82 55
